# Supplementary material for: Cobalt oxide decked with inorganic-sulfur containing vanadium oxide for chromium(vi) reduction and UV-light-assisted methyl orange degradation
Source: Royal Society of Chemistry journal article supplement (doi:10.1039/d3ma00625e), 2023-01-01
Supplement: d3ma00625e1.pdf [file d3ma00625e1.pdf]

## Supporting Information

**Cobalt oxide decked with inorganic-sulfur containing vanadium oxide for chromium (VI) reduction and UV-light assisted methyl orange degradation**

**Sayanika Saikia<sup>a</sup>, Manoshi Saikia<sup>a</sup>, Salma A. Khanam<sup>a</sup>, Seonghwan Lee<sup>b</sup>, Young-Bin Park<sup>b</sup>, Lakshi Saikia<sup>c</sup>, Gautam Gogoi<sup>a</sup>, and Kusum K. Bania<sup>a\*</sup>**

<sup>a</sup>*Department of Chemical Sciences, Tezpur University, Assam, India, 784028.*

<sup>b</sup>*Department of Mechanical Engineering, Ulsan National Institute of Science and Technology, UNIST-gil 50, Ulju-gun, Ulsan 44919, Republic of Korea.*

<sup>c</sup>*Materials Science and Technology Division (MSTD), CSIR-North East Institute of Science and Technology, Jorhat 785006, Assam, India.*

### Corresponding Author

\*Email: [kusum@tezu.ernet.in](mailto:kusum@tezu.ernet.in) or [bania.kusum8@gmail.com](mailto:bania.kusum8@gmail.com).

ORCID

**Kusum K. Bania:** 0000-0001-6535-3913

| Sl No. | Title                                                                                                                                                                                                                            | Page No. |
|--------|----------------------------------------------------------------------------------------------------------------------------------------------------------------------------------------------------------------------------------|----------|
| 1      | Physical Measurements                                                                                                                                                                                                            | S3-S4    |
| 2      | DRS and Tauc's plot of S-VO <sub>x</sub> and CoO <sub>x</sub> , Fig. S1                                                                                                                                                          | S5       |
| 3      | XPS of C(1s) of CoO <sub>x</sub> -S-VO <sub>x</sub> , Fig. S2                                                                                                                                                                    | S6       |
| 4      | EPR analysis and TGA analysis of CoO <sub>x</sub> -S-VO <sub>x</sub> , Fig. S3                                                                                                                                                   | S7       |
| 5      | STEM-HAADF-EDX mapping of CoO <sub>x</sub> -S-VO <sub>x</sub> , Fig. S4                                                                                                                                                          | S8       |
| 6      | Kinetics of Cr(VI) reduction, Fig. S5                                                                                                                                                                                            | S9       |
| 7      | UV spectra and bar diagram of Cr(VI) reduction for different Cr solution concentration, Fig. S6                                                                                                                                  | S10      |
| 8      | Efficiency of S-VO <sub>x</sub> , CoO <sub>x</sub> , Co <sub>3</sub> O <sub>4</sub> -V <sub>2</sub> O <sub>5</sub> and CoO <sub>x</sub> -S-VO <sub>x</sub> material towards Cr(VI) reduction under optimized conditions, Fig. S7 | S11      |
| 9      | Cyclic voltamogram of Cr(VI) reduction with CoO <sub>x</sub> -S-VO <sub>x</sub> , Fig. S8                                                                                                                                        | S12      |
| 10     | Efficiency of CoO <sub>x</sub> -S-VO <sub>x</sub> towards MO degradation under normal laboratory condition and under dark, Fig. S9                                                                                               | S13      |
| 11     | Efficiency of S-VO <sub>x</sub> , CoO <sub>x</sub> , Co <sub>3</sub> O <sub>4</sub> -V <sub>2</sub> O <sub>5</sub> and CoO <sub>x</sub> -S-VO <sub>x</sub> material towards MO degradation, Fig. S10                             | S14      |
| 12     | UV spectra and bar diagram of MO degradation for different MO solution concentration, Fig. S11                                                                                                                                   | S15      |
| 13     | Point of zero charge (PZC) and effect of pH on MO degradation, Fig. S12                                                                                                                                                          | S16      |
| 14     | Photoluminescence (PL) spectra, Fig. S13                                                                                                                                                                                         | S17      |
| 15     | Ultraviolet photoelectron spectroscopy (UPS) analysis, Fig. S14                                                                                                                                                                  | S18      |
| 16     | Photocatalytic degradation mechanism using electron scavenger, hole scavenger and radical scavenger, Fig. S15                                                                                                                    | S19      |
| 17     | Recyclability of CoO <sub>x</sub> -S-VO <sub>x</sub> , Fig. S16, S17, S18                                                                                                                                                        | S20-S21  |

## 1. Physical measurement

Physical measurements for different characterizations and analyses were done by the following techniques. The powder-X-ray diffraction (XRD) patterns were recorded in an instrument from BRUKER AXS, D8 FOCUS in the  $2\theta$  value range of  $5-75^\circ$ . The X-ray photoelectron (XPS) spectra were obtained from a XPS KRATOS (ESCA AXIS 165) spectrometer having Mg K $\alpha$  (1253.6 eV) as radiation source. Before transferring to the analysis chamber, the oven-dried sample was crushed into small pieces, sprinkled on a graphite sheet (double rod), and attached to a normal sample holder. The material was degassed overnight in a vacuum oven. The binding energy value was modified with reference to the 284.8 eV C 1s peak and the peak was deconvoluted using Origin software. Scanning Electron Microscope (SEM) images along with the X-Ray and Elemental mapping analyses were done SIGMA instrument manufactured by Carl Zeiss Microscopy. The Transmission Electron Microscope (TEM) images along with energy dispersive X-ray spectroscopy (EDX) analysis was performed on a JEM2010 (JEOL) instrument equipped with a slow scan CCD camera at an acceleration voltage of 200 kV. The UV-Vis experiments were carried out in Shimadzu, UV-2550 spectrophotometer. 500 mL of quartz glass chamber with a Mercury lamp, light source was surrounded by a double jacketed quartz immersion with an inlet and outlet of water circulation to ensure a safe temperature for the photocatalytic reaction. The infrared spectra had been recorded on a Perkin- Elmer 2000 FTIR spectrometer within the range of  $450-4000\text{ cm}^{-1}$ . The spectra of the solid samples were recorded as KBr pellets through blending the samples with KBr. The Diffuse Reflectance Spectra (DRS) were recorded employing a Hitachi U-3400 spectrophotometer. The cyclic voltammetry (CV) and Mott Schottky (MS) analysis studies were performed in a CHI-600E meter from CH

Instruments using the glassy carbon electrode (GCE) and Pt as a working electrode, Ag/AgCl as reference electrode and Pt wire as a counter electrode, respectively.

## 2. DRS and Tauc's plot of S-VO<sub>x</sub> and CoO<sub>x</sub>

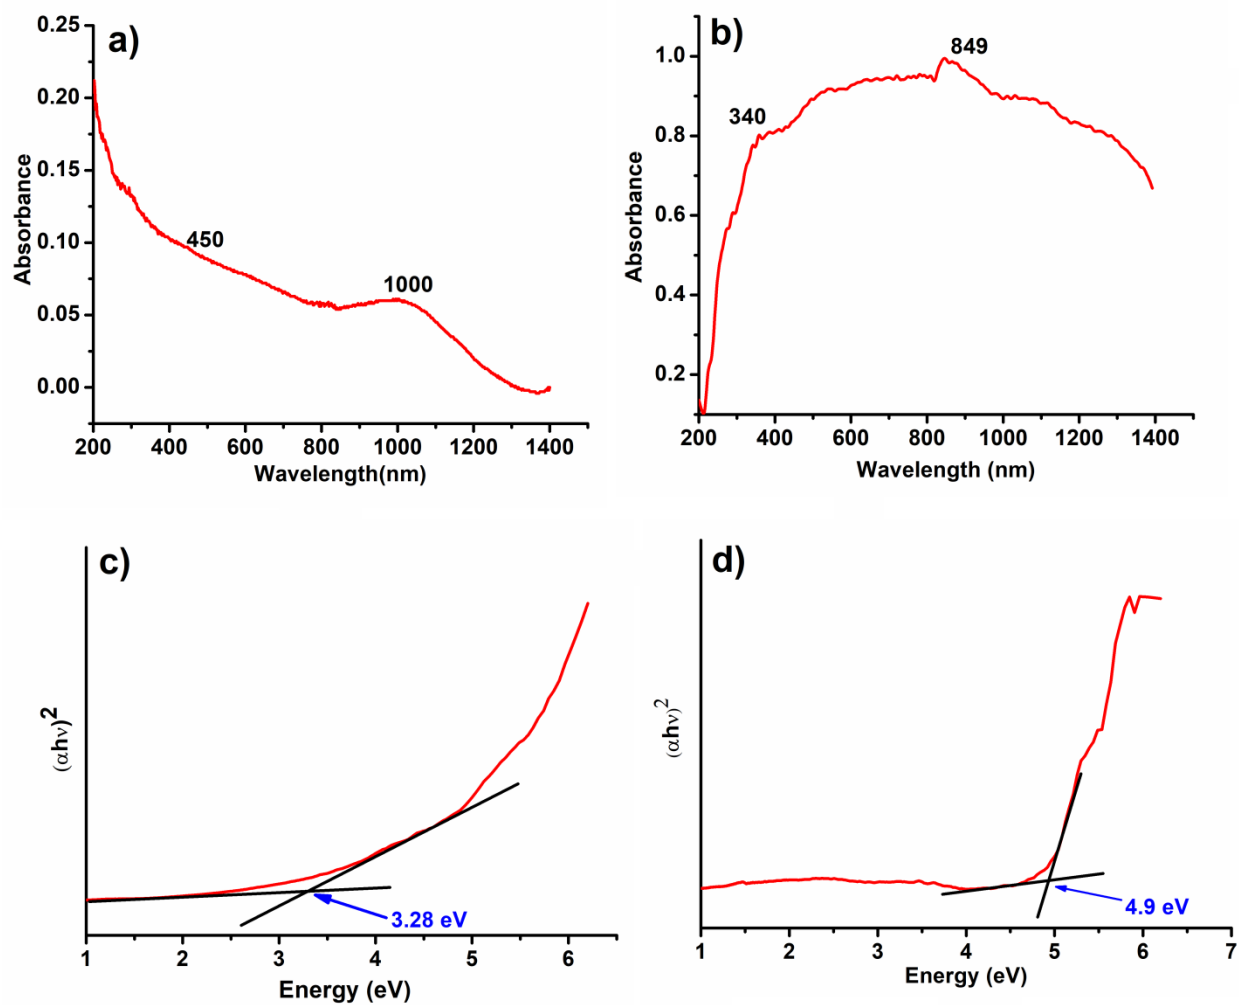

**Fig. S1** DRS plot of a) CoO<sub>x</sub> and b) S-VO<sub>x</sub>, Tauc's plot of (a) CoO<sub>x</sub> and (b) S-VO<sub>x</sub>.

### 3. XPS of C(1s) of CoO<sub>x</sub>-S-VO<sub>x</sub>

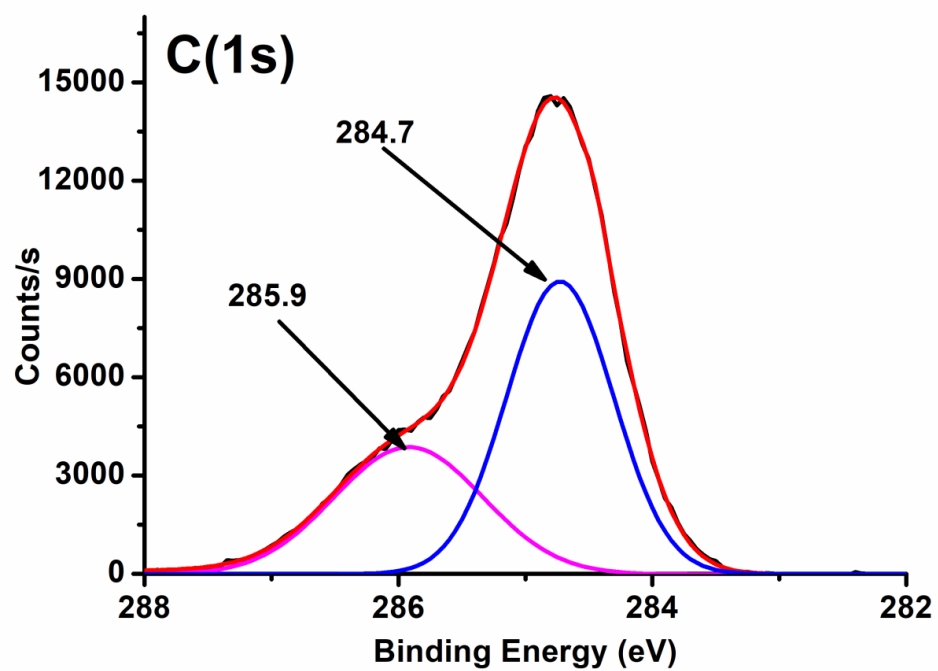

**Fig. S2** XPS of C(1s) taken for peak fitting.

**4. Electron Paramagnetic Resonance(EPR) spectra and Thermogravimetric Analysis(TGA) of  $\text{CoO}_x\text{-S-VO}_x$  material.**

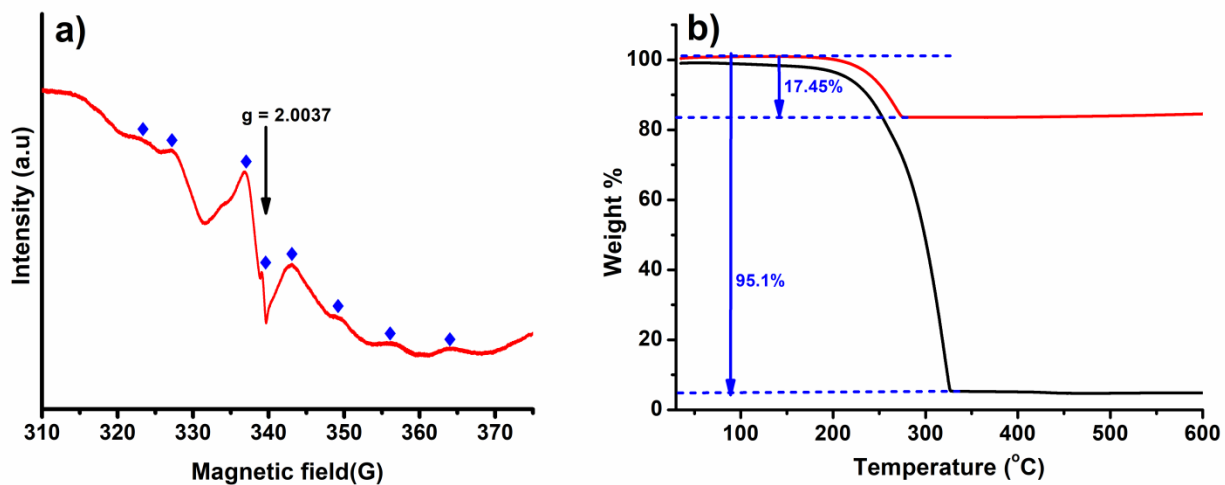

**Fig. S3** (a)EPR spectra  $\text{CoO}_x\text{-S-VO}_x$  and (b)TGA curve of  $\text{CoO}_x\text{-S-VO}_x$  (red) and  $\text{S-VO}_x$  (black) material.

5. STEM-HAADF-EDX mapping of  $\text{CoO}_x\text{-S-VO}_x$  material in different region.

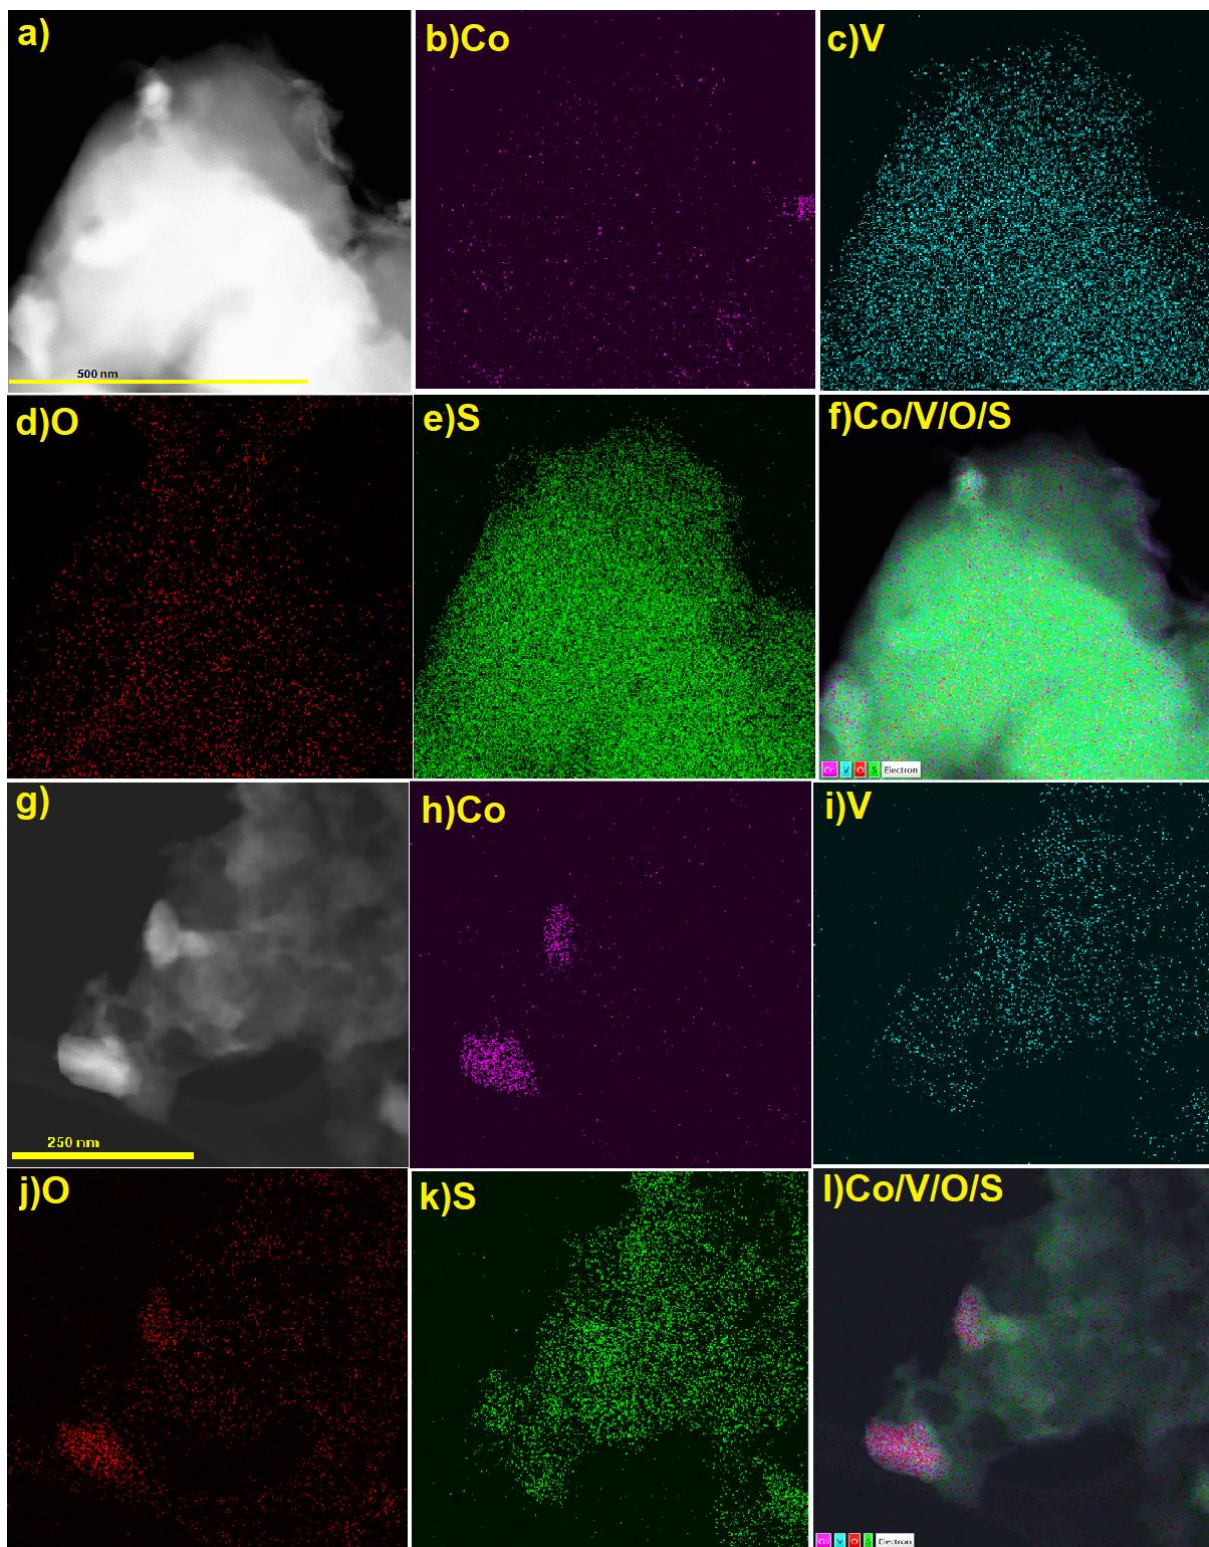

**Fig. S4** STEM-HAADF-EDX mapping of  $\text{CoO}_x\text{-S-VO}_x$  material in different region.

## 6. Kinetics of Cr(VI) reduction

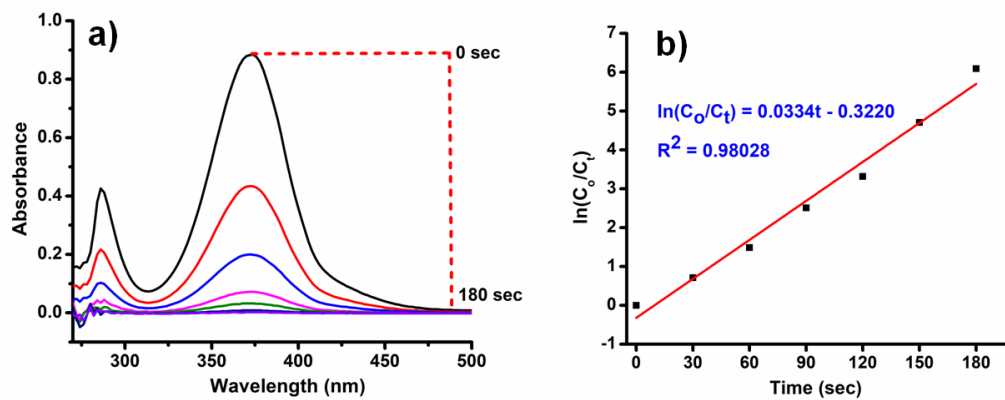

**Fig. S5** (a) UV spectra recorded at 30 sec interval of time in optimized reaction condition and (b)  $\ln(C_0/C_t)$  vs time graph showing kinetic study for Cr(VI) reduction.

**7. UV spectra and bar diagram of Cr(VI) reduction for different Cr solution concentration with 10 mg CoO<sub>x</sub>-S-VO<sub>x</sub> and 1 mmol NaBH<sub>4</sub>**

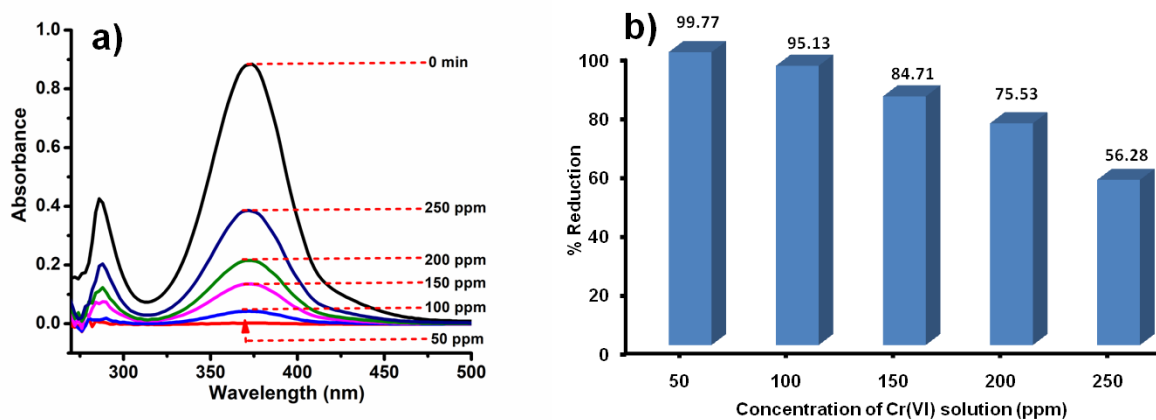

**Fig. S6** (a) UV spectra and (b) bar diagram of Cr(VI) reduction for different Cr solution concentration.

**8. Efficiency of S-VO<sub>x</sub>, CoO<sub>x</sub>, Co<sub>3</sub>O<sub>4</sub>-V<sub>2</sub>O<sub>5</sub> and CoO<sub>x</sub>-S-VO<sub>x</sub> material towards Cr(VI) reduction under optimized conditions.**

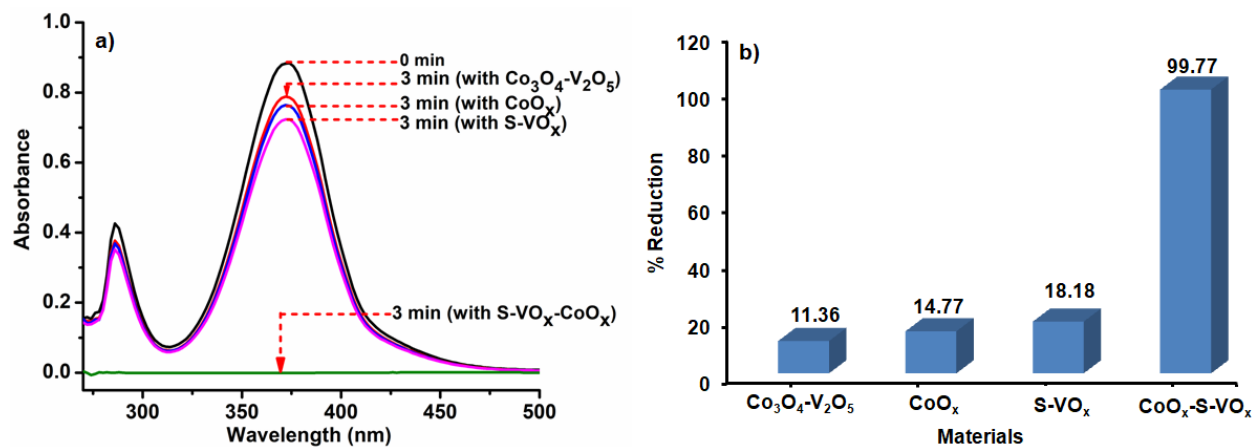

**Fig. S7** (a) UV spectra and (b) bar diagram representing the Cr(VI) reduction efficiency with Co<sub>3</sub>O<sub>4</sub>-V<sub>2</sub>O<sub>5</sub>, CoO<sub>x</sub>, S-VO<sub>x</sub> and CoO<sub>x</sub>-S-VO<sub>x</sub>.

### 9. Cyclic voltamogram of Cr(VI) reduction with $\text{CoO}_x\text{-S-VO}_x$

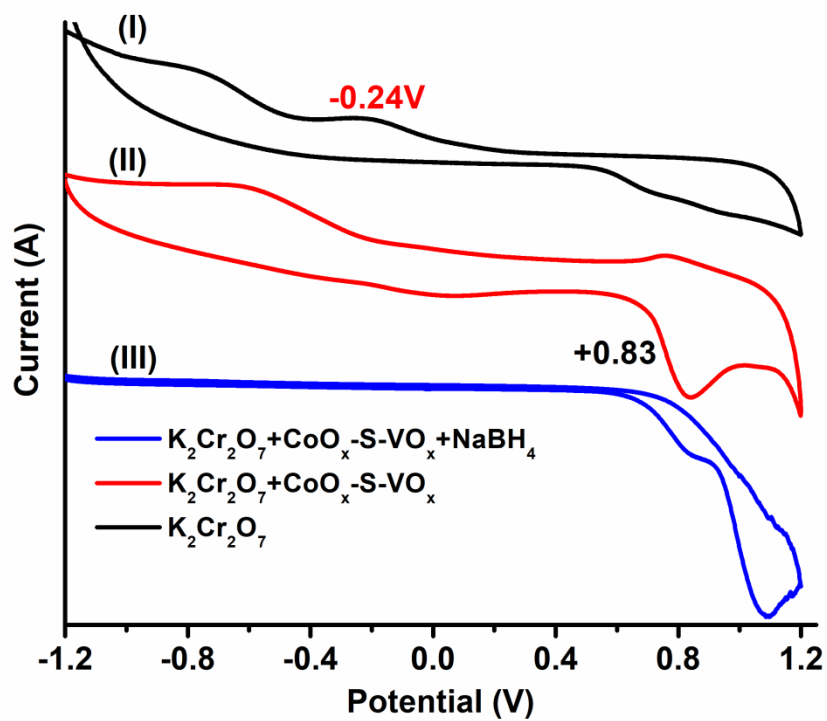

**Fig. S8** CV of (I)  $\text{K}_2\text{Cr}_2\text{O}_7$  (II)  $\text{K}_2\text{Cr}_2\text{O}_7 + \text{CoO}_x\text{-S-VO}_x$  and (III)  $\text{K}_2\text{Cr}_2\text{O}_7 + \text{CoO}_x\text{-S-VO}_x + \text{NaBH}_4$

**10. Efficiency of  $\text{CoO}_x\text{-S-VO}_x$  towards MO degradation under normal laboratory condition and under dark.**

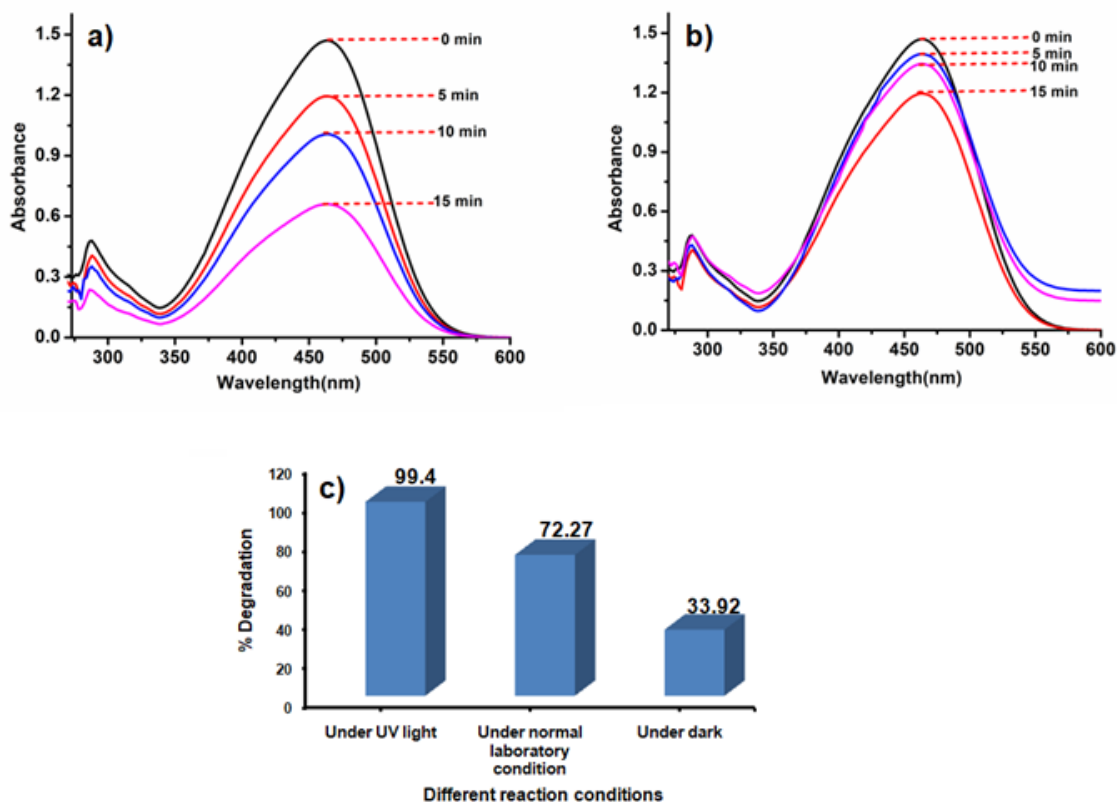

**Fig. S9** MO degradation efficiency with  $\text{CoO}_x\text{-S-VO}_x$  (a) under normal laboratory condition, (b) under dark, c) comparative bar diagram for MO degradation efficiency with  $\text{CoO}_x\text{-S-VO}_x$  upto 40 min.

## 11. Efficiency of S-VO<sub>x</sub>, CoO<sub>x</sub>, Co<sub>3</sub>O<sub>4</sub>-V<sub>2</sub>O<sub>5</sub> and CoO<sub>x</sub>-S-VO<sub>x</sub> material towards MO degradation

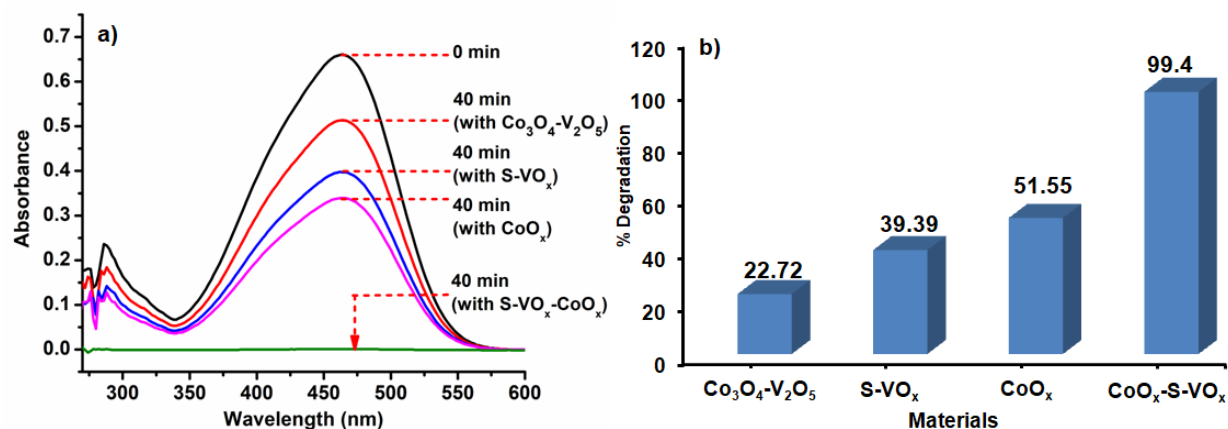

**Fig. S10** (a) UV spectra and (b) bar diagram representing the MO degradation efficiency with Co<sub>3</sub>O<sub>4</sub>-V<sub>2</sub>O<sub>5</sub>, S-VO<sub>x</sub>, CoO<sub>x</sub> and CoO<sub>x</sub>-S-VO<sub>x</sub>.

**12. UV spectra and bar diagram of MO degradation for different MO solution concentration**

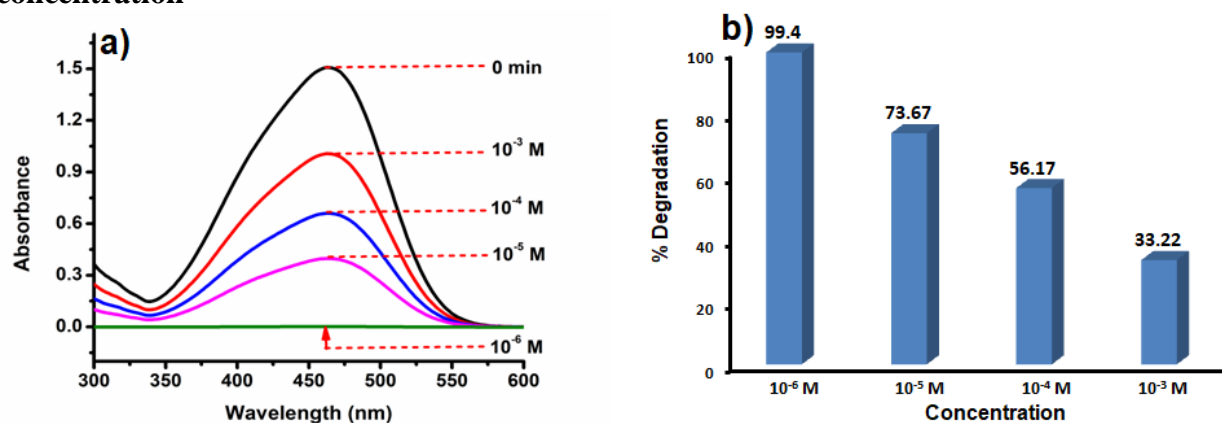

**Fig. S11** (a) UV spectra and (b) bar diagram of MO degradation for different MO solution concentration.

### 13. Point of Zero Charge (PZC) determination and effect of pH on MO degradation with $\text{CoO}_x\text{-S-VO}_x$ .

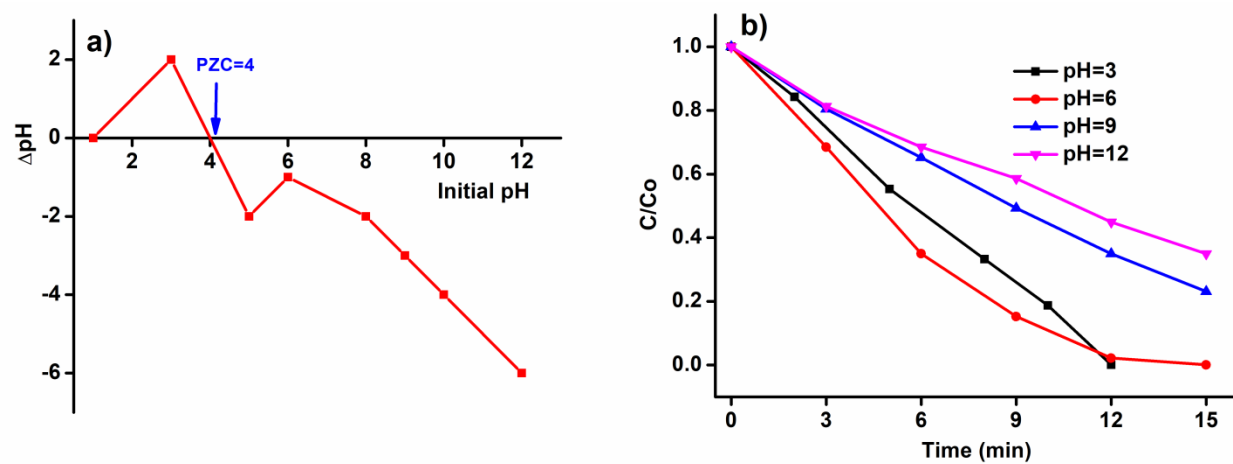

**Fig. S12** (a) Point of zero charge of  $\text{CoO}_x\text{-S-VO}_x$  material and (b) efficiency of MO degradation at different pH.

## 14. Photoluminescence (PL) Spectra

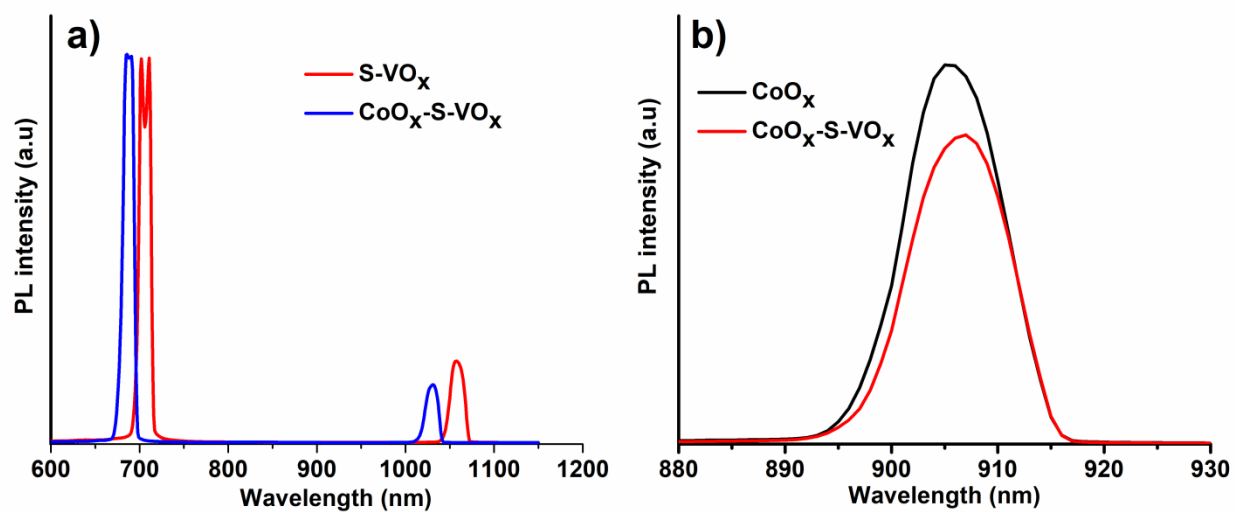

**Fig. S13** PL spectra recorded at excitation wavelength of (a) 450 nm and (b) 740 nm

## 15. Ultraviolet Photoelectron Spectroscopy (UPS) analysis.

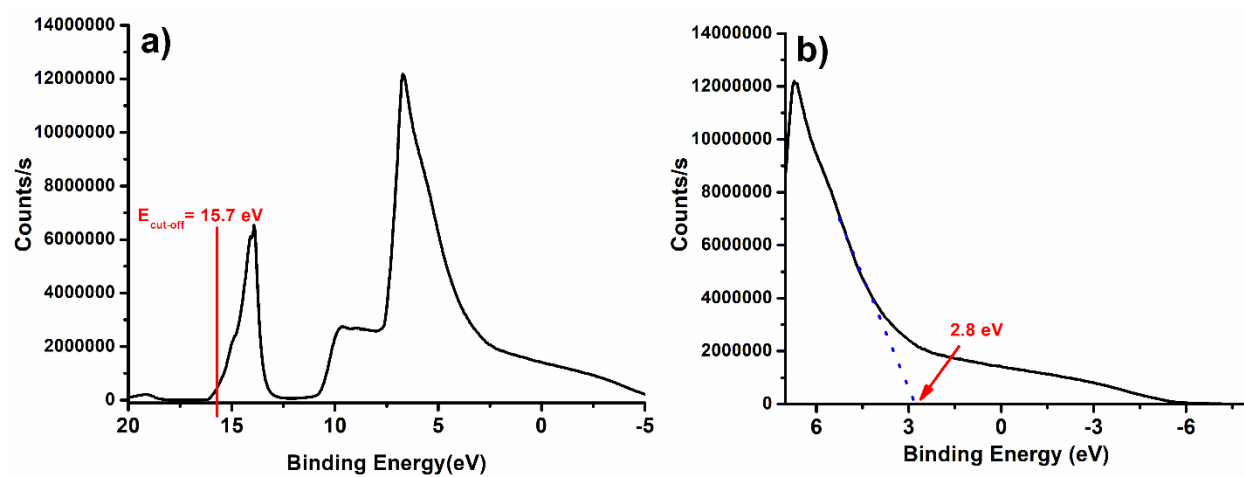

**Fig. S14** a) UPS spectra and b) Valence band energy of CoO<sub>x</sub>-S-VO<sub>x</sub>

**16. Photocatalytic degradation mechanism using electron scavenger ( $\text{AgNO}_3$ ), hole scavenger (KI) and  $\text{OH}^\bullet$  radical scavenger (isopropanol) and  $\text{O}_2^\bullet$  radical scavenger (ascorbic acid)**

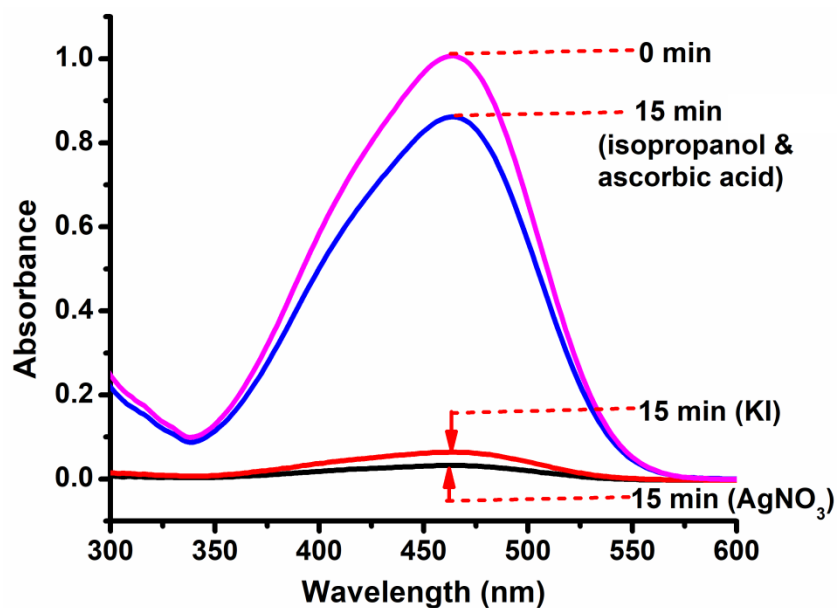

**Fig. S15** Photocatalytic degradation mechanism using electron scavenger ( $\text{AgNO}_3$ ), hole scavenger (KI) and  $\text{OH}^\bullet$  radical scavenger (isopropanol) and  $\text{O}_2^\bullet$  radical scavenger (ascorbic acid).

## 17. Recyclability test of $\text{CoO}_x\text{-S-VO}_x$

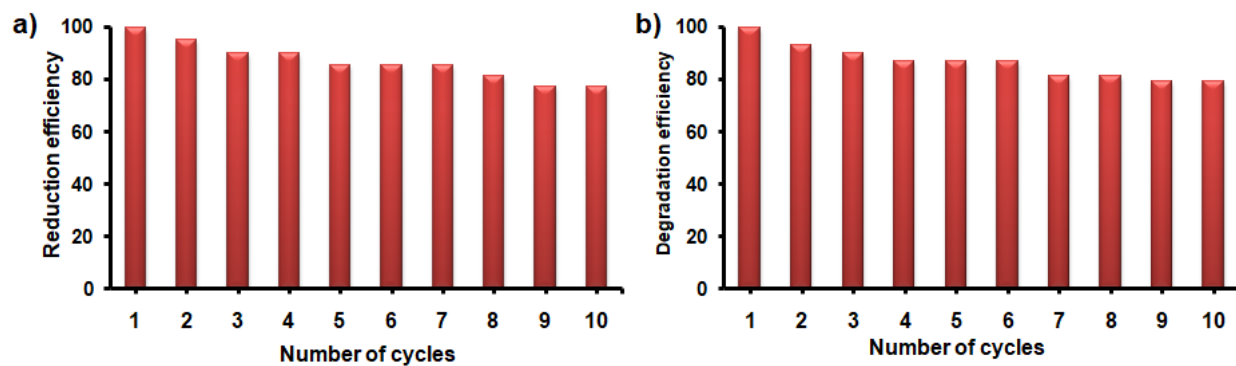

**Fig. S16** Recyclable efficiency of  $\text{CoO}_x\text{-S-VO}_x$  in case of (a) Cr(VI) reduction and (b) MO degradation.

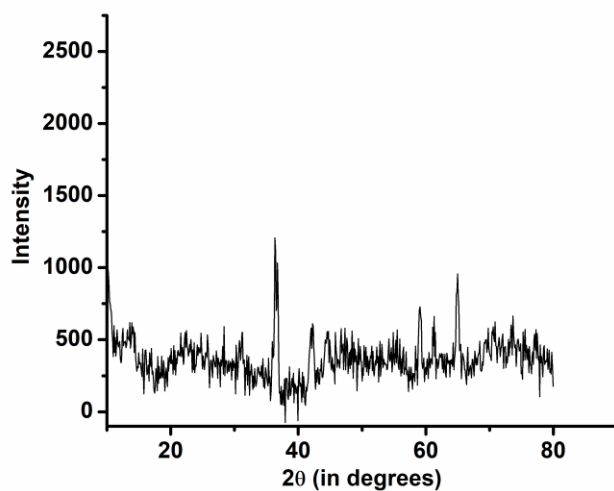

**Fig. S17** PXRD spectra of recycled  $\text{CoO}_x\text{-S-VO}_x$  catalyst after 10<sup>th</sup> cycle.

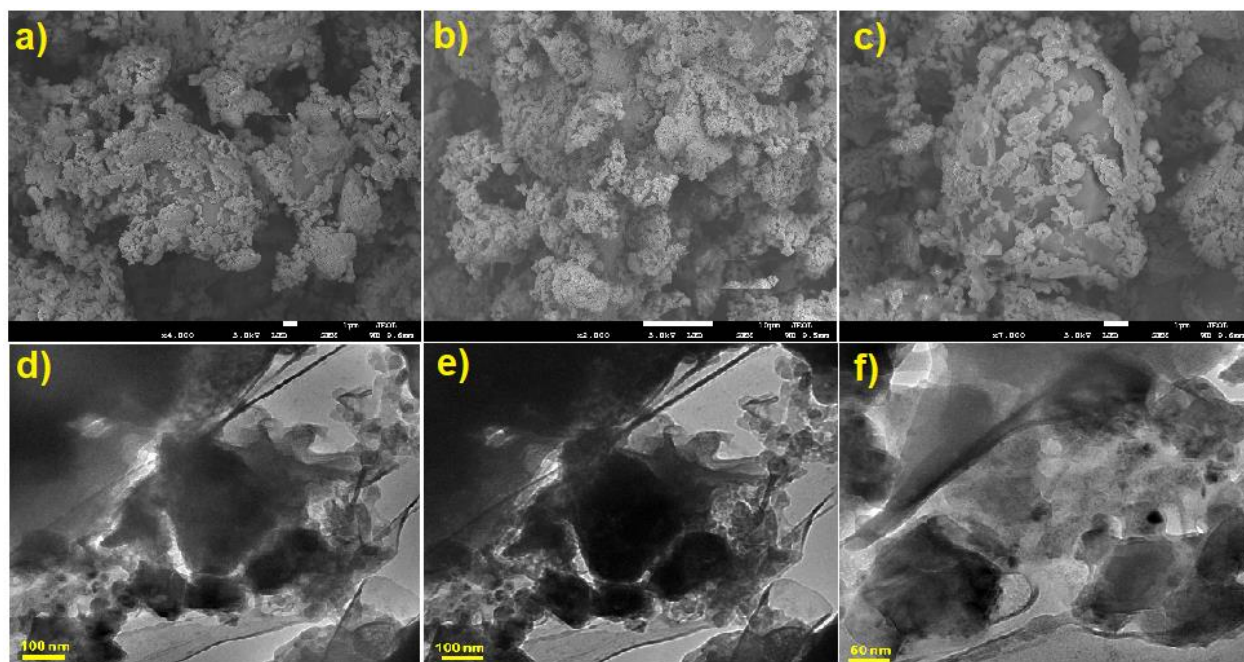

**Fig. S18** (a-c) SEM images and (d-f) TEM images of recycled  $\text{CoO}_x\text{-S-VO}_x$  catalyst after 10<sup>th</sup> cycle.
